# Supplementary material for: Exploring microscale heterogeneity as a driver of biogeochemical transformations and gas transport in peat
Source: Copernicus journal article supplement (doi:10.5194/bg-22-1711-2025), 2025-04-01
Supplement: Supplementary file 1 [file bg-22-1711-2025-supplement.pdf]

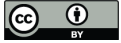

*Supplement of*

## **Exploring microscale heterogeneity as a driver of biogeochemical transformations and gas transport in peat**

**Lukas Kohl et al.**

*Correspondence to:* Lukas Kohl ([lukas.kohl@helsinki.fi](mailto:lukas.kohl@helsinki.fi))

The copyright of individual parts of the supplement might differ from the article licence.

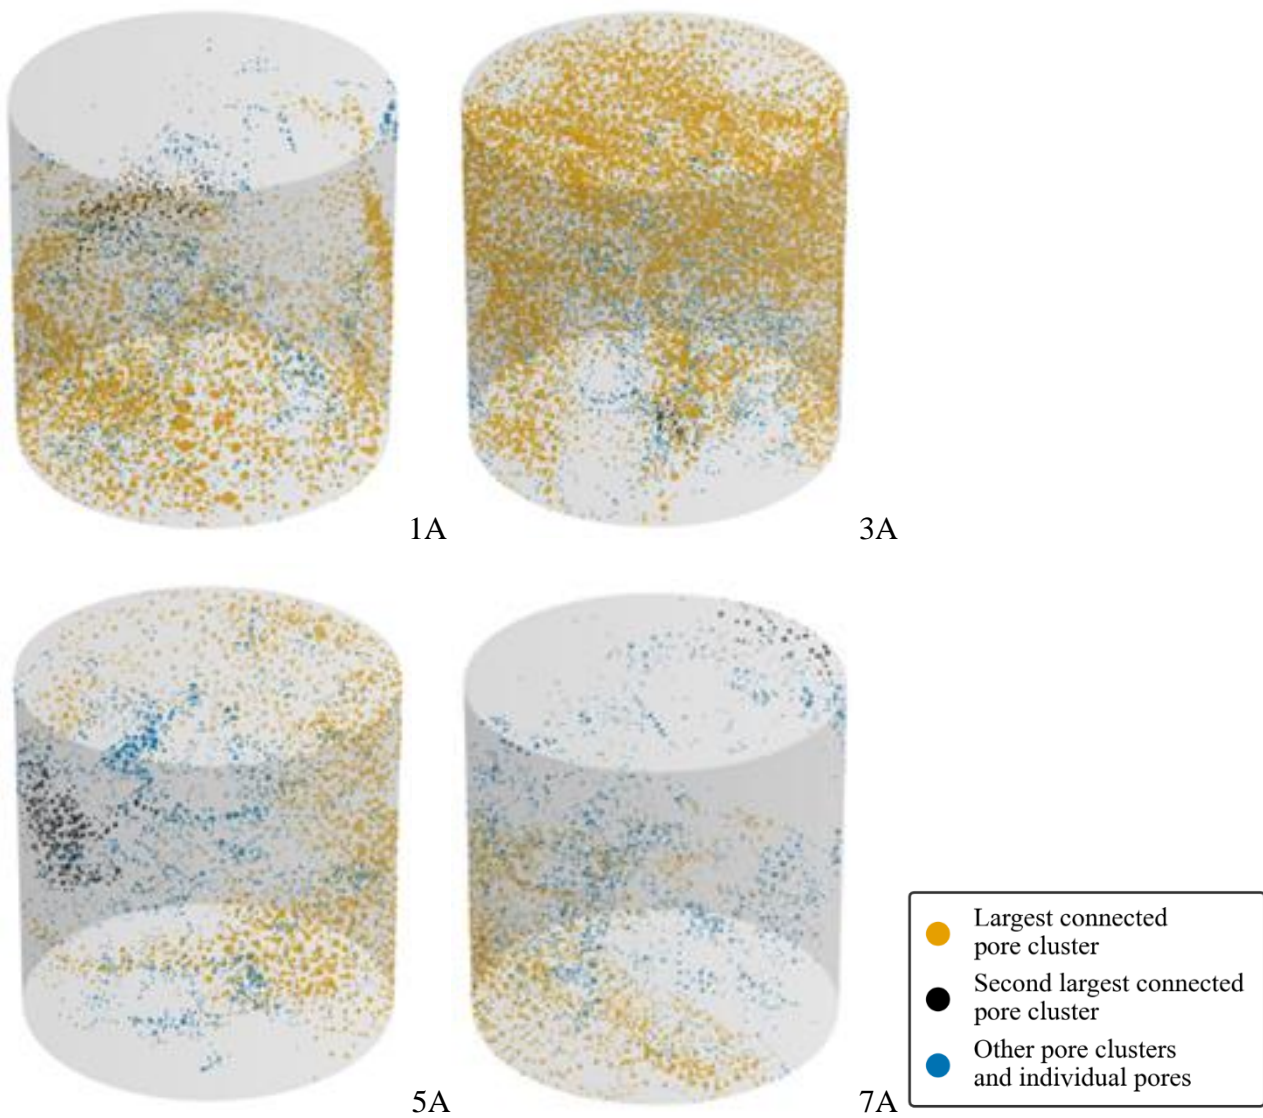

**Fig S1.** The pore system of the final image domain / network domain of the sample. Largest (= highest number of pores) connected pore cluster (= the pore network) in brown; second largest connected pore cluster in black; other pore clusters + individual pores in blue. [The illustration of the second largest cluster gives some indication of the connectivity of the blue pores. The marker sizes show the relative sizes of the pores (in comparison to each other); otherwise, the pore sizes are not to scale and the image is for illustrative purposes only.]

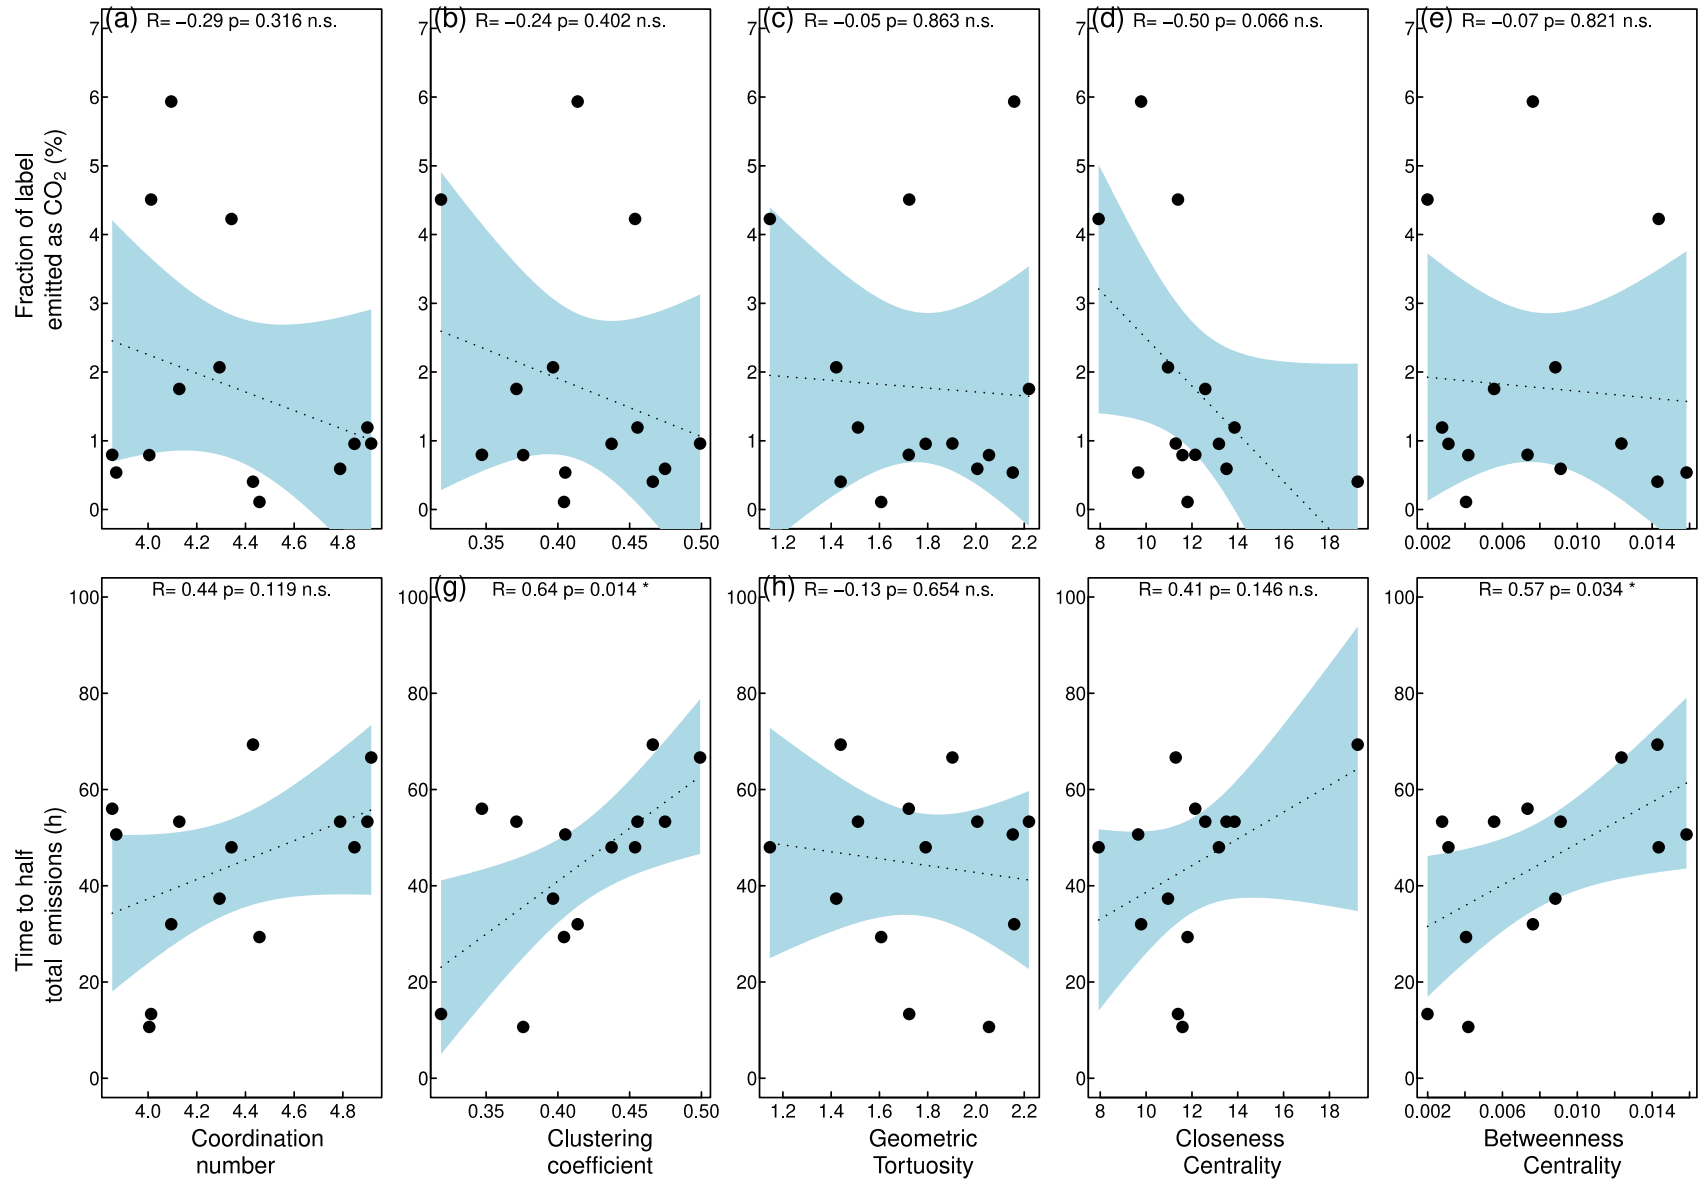

30

**Figure S2.** Correlation between network metrics and emission characteristics (fraction of label emitted as CO<sub>2</sub>, lag of CO<sub>2</sub> emission, time to half of total emission).

**Table S1.** Correlation coefficients between air filled porosity, network metrics, and

|                                                              | air-filled por.<br>0-5cm | air-filled por.<br>0-8cm | Coord.<br>numb. | Clust. coef. | Geom<br>tort. | Closen.<br>centr. | Betw. centr. | Label-der.<br>CO <sub>2</sub> 2cm | Label-der.<br>CO <sub>2</sub> 5cm | Label-der.<br>CO <sub>2</sub> 8cm | t1/2 2cm | t1/2 5cm | t1/2 8cm |
|--------------------------------------------------------------|--------------------------|--------------------------|-----------------|--------------|---------------|-------------------|--------------|-----------------------------------|-----------------------------------|-----------------------------------|----------|----------|----------|
| air-filled porosity 0-2cm                                    | 0.90                     | 0.73                     | 0.14            | -0.31        | 0.15          | 0.01              | -0.70        | -0.09                             | 0.49                              | 0.43                              | -0.79    | -0.71    | -0.33    |
| air-filled porosity 0-5cm                                    |                          | 0.88                     | 0.23            | -0.27        | -0.08         | 0.05              | -0.78        | -0.15                             | 0.29                              | 0.27                              | -0.73    | -0.83    | -0.36    |
| air-filled porosity 0-8cm                                    |                          |                          | -0.01           | -0.49        | 0.03          | -0.01             | -0.88        | -0.34                             | -0.06                             | 0.15                              | -0.47    | -0.75    | -0.65    |
| Coordination number                                          |                          |                          |                 | 0.80         | -0.26         | 0.33              | -0.08        | -0.18                             | 0.41                              | -0.28                             | -0.29    | -0.24    | 0.48     |
| Clustering coefficient                                       |                          |                          |                 |              | -0.21         | 0.24              | 0.48         | 0.13                              | 0.36                              | -0.23                             | -0.02    | 0.18     | 0.66     |
| Geometric tortuosity                                         |                          |                          |                 |              |               | -0.11             | -0.13        | -0.04                             | 0.09                              | -0.06                             | -0.08    | 0.16     | -0.13    |
| Closeness centrality                                         |                          |                          |                 |              |               |                   | -0.07        | -0.23                             | 0.19                              | -0.49                             | 0.07     | -0.22    | 0.38     |
| Betweenness centrality                                       |                          |                          |                 |              |               |                   |              | 0.62                              | 0.01                              | -0.06                             | 0.41     | 0.71     | 0.56     |
| Label-derived CO <sub>2</sub> emitted<br>after 2cm injection |                          |                          |                 |              |               |                   |              |                                   | 0.34                              | 0.28                              | -0.22    | 0.21     | 0.43     |
| Label-derived CO <sub>2</sub> emitted<br>after 5cm injection |                          |                          |                 |              |               |                   |              |                                   |                                   | 0.46                              | -0.58    | -0.35    | 0.32     |
| Label-derived CO <sub>2</sub> emitted<br>after 8cm injection |                          |                          |                 |              |               |                   |              |                                   |                                   |                                   | -0.42    | -0.22    | -0.38    |
| t1/2 after 2cm injection                                     |                          |                          |                 |              |               |                   |              |                                   |                                   |                                   |          | 0.71     | -0.06    |
| t1/2 after 5cm injection                                     |                          |                          |                 |              |               |                   |              |                                   |                                   |                                   |          |          | 0.26     |
